# Supplementary material for: Mechanisms underlying microglial colonization of developing neural retina in zebrafish
Source: eLife. 2021 Dec 7;10:e70550. doi: 10.7554/eLife.70550 (PMC8651297; doi:10.7554/eLife.70550)
Supplement: Figure 1—figure supplement 1—source data 1. [file elife-70550-fig1-figsupp1-data1.xlsx]

## Sheet: Fig1 figure supplememt 1B
# L-plastin+ cells from 32-54 hpf
	sample 1	sample 2	sample 3	sample 4	sample 5	sample 6	sample 7	sample 8	sample 9	sample10
32h	0	1	1	2	0	1	0	0	1	0
36h	0	0	2	2	0	4	1	0	2	2
42h	13	11	3	9	5	3	8	6	6	7
48h	20	16	13	11	7	5	16	9	10	6
54h	10	11	14	14	22	23	13	14	10	13
