# Supplementary material for: Mechanisms underlying microglial colonization of developing neural retina in zebrafish
Source: eLife. 2021 Dec 7;10:e70550. doi: 10.7554/eLife.70550 (PMC8651297; doi:10.7554/eLife.70550)
Supplement: Figure 1—figure supplement 2—source data 1. [file elife-70550-fig1-figsupp2-data1.xlsx]

## Sheet: 32hpf
mfap4+ cells in vitreous and neural retina
Vitreous Area	Neural Retina
2	0			Unpaired t test
1	0			P value	0.0133
1	0			P value summary	*
2	0			Significantly different (P < 0.05)?	Yes
3	1			One- or two-tailed P value?	Two-tailed
3	2			t, df	t=3.000, df=10

## Sheet: 36hpf
mfap4+ cells in vitreous and neural retina
Vitreous Area	Neural Retina			Unpaired t test
3	1			P value	0.0004
5	2			P value summary	***
4	0			Significantly different (P < 0.05)?	Yes
1	1			One- or two-tailed P value?	Two-tailed
2	0			t, df	t=4.677, df=14
3	0
2	0
4	0

## Sheet: 42hpf
mfap4+ cells in vitreous and neural retina
Vitreous Area	Neural Retina
3	3		Unpaired t test
2	2		P value	0.2306
5	1		P value summary	ns
0	2		Significantly different (P < 0.05)?	No
3	0		One- or two-tailed P value?	Two-tailed
2	0		t, df	t=1.230, df=24
2	1
1	1
5	5
8	4
3	4
4	4
5	4

## Sheet: 48hpf
mfap4+ cells in vitreous and neural retina
Vitreous Area	Neural Retina
8	3			Unpaired t test
7	1			P value	0.0496
3	3			P value summary	*
6	1			Significantly different (P < 0.05)?	Yes
0	3			One- or two-tailed P value?	Two-tailed
4	2			t, df	t=2.060, df=26
3	4
3	0
2	5
4	3
8	4
2	6
7	3
5	1

## Sheet: 54hpf
mfap4+ cells in vitreous and neural retina
Vitreous Area	Neural Retina
2	1			Unpaired t test
1	3			P value	0.0201
0	4			P value summary	*
5	2			Significantly different (P < 0.05)?	Yes
1	6			One- or two-tailed P value?	Two-tailed
0	4			t, df	t=2.476, df=26
3	2
2	2
2	2
3	6
0	6
5	5
1	8
4	3
