# Supplementary material for: Mechanisms underlying microglial colonization of developing neural retina in zebrafish
Source: eLife. 2021 Dec 7;10:e70550. doi: 10.7554/eLife.70550 (PMC8651297; doi:10.7554/eLife.70550)
Supplement: Figure 1—figure supplement 4—source data 1. [file elife-70550-fig1-figsupp4-data1.xlsx]

## Sheet: Fig.1-figure supplement 4D
Area	Cell types	number
Yolk	mCherry-zGem; mpeg1.1:EGFP double positive cells	5
	only mpeg1.1:EGFP positive cells	2
Tail	mCherry-zGem; mpeg1.1:EGFP double positive cells	24
	only mpeg1.1:EGFP positive cells	15
