# Supplementary material for: Mechanisms underlying microglial colonization of developing neural retina in zebrafish
Source: eLife. 2021 Dec 7;10:e70550. doi: 10.7554/eLife.70550 (PMC8651297; doi:10.7554/eLife.70550)
Supplement: Figure 1—source data 1. [file elife-70550-fig1-data1.xlsx]

## Sheet: Fig1C
# Myeloid/microglia precursors from 32-54 hpf
	sample 1	sample 2	sample 3	sample 4	sample 5	sample 6	sample 7	sample 8	sample 9
32h	3	6	6	4	2	3	5
36h	19	14	15	9	9	9	18
42h	20	21	20	17	18	19	19	20	18
48h	35	26	28	33	14	29	31	15	23
54h	30	38	36	32	29	28	24	31
