# Supplementary material for: Mechanisms underlying microglial colonization of developing neural retina in zebrafish
Source: eLife. 2021 Dec 7;10:e70550. doi: 10.7554/eLife.70550 (PMC8651297; doi:10.7554/eLife.70550)
Supplement: Figure 1—source data 2. [file elife-70550-fig1-data2.xlsx]

## Sheet: Fig1E
mpeg1.1:EGFP
32h	8	2	3	3	2	4	4	5	4
36h	4	3	4	5	7	3	3	5	7
42h	14	26	28	26	15	19	14	13	23
49h	13	18	24	26	30	26	27
54h	19	28	37	23	29	25	26
Double positive cells
32h	1	0	0	0	0	0	0	0	0
36h	2	1	1	3	0	0	0	0	0
42h	7	1	0	0	0	0	0	0	0
49h	1	0	0	0	0	0	0
54h	2	1	0	0	0	0	0
