# Supplementary material for: Mechanisms underlying microglial colonization of developing neural retina in zebrafish
Source: eLife. 2021 Dec 7;10:e70550. doi: 10.7554/eLife.70550 (PMC8651297; doi:10.7554/eLife.70550)
Supplement: Figure 1—source data 3. [file elife-70550-fig1-data3.xlsx]

## Sheet: Fig1G
Number of BrdU+ mpeg1.1:EGFP cells per retina
Total mpeg1.1:EGFP cells	BrdU+ mpeg1.1:EGFP cells			Paired t test
11	3			P value	0.0082
12	1			P value summary	**
12	2			Significantly different (P < 0.05)?	Yes
				One- or two-tailed P value?	Two-tailed
				t, df	t=10.96, df=2
				Number of pairs	3

## Sheet: Fig1H
Fraction of BrdU+mpeg1.1EGFP+ cells in total mpeg1.1EGFP+ cells
27.27
8.33
16.67
