# Supplementary material for: Mechanisms underlying microglial colonization of developing neural retina in zebrafish
Source: eLife. 2021 Dec 7;10:e70550. doi: 10.7554/eLife.70550 (PMC8651297; doi:10.7554/eLife.70550)
Supplement: Figure 2—figure supplement 2—source data 1. [file elife-70550-fig2-figsupp2-data1.xlsx]

## Sheet: Fig.2-figure supplement 2B
Number of mfap4+ cells in optic tectum
STD-MO 48h	tnnt2a-MO 48h	STD-MO 72h	tnnt2a-MO 72h		Unpaired t test with Welch's correction (STD-MO vs tnnt2a-MO at 48 hpf)
7	13	33	23		P value	0.0008
4	22	38	21		P value summary	***
6	19	21	31		Significantly different (P < 0.05)?	Yes
4	20	42	18		One- or two-tailed P value?	Two-tailed
5	15				Welch-corrected t, df	t=7.180, df=4.978
					Unpaired t test with Welch's correction (STD-MO vs tnnt2a-MO at 72 hpf)
					P value	0.1133
					P value summary	ns
					Significantly different (P < 0.05)?	No
					One- or two-tailed P value?	Two-tailed
					Welch-corrected t, df	t=1.921, df=4.963
