# Supplementary material for: Mechanisms underlying microglial colonization of developing neural retina in zebrafish
Source: eLife. 2021 Dec 7;10:e70550. doi: 10.7554/eLife.70550 (PMC8651297; doi:10.7554/eLife.70550)
Supplement: Figure 2—source data 1. [file elife-70550-fig2-data1.xlsx]

## Sheet: Fig2D
Number of ocular mfap4+ cells
STD MO	tnnt2a MO			Unpaired t test
14	6			P value	0.0003
12	7			P value summary	***
16	6			Significantly different (P < 0.05)?	Yes
11	6			One- or two-tailed P value?	Two-tailed
9	4			t, df	t=5.423, df=10
10	3
