# Supplementary material for: Mechanisms underlying microglial colonization of developing neural retina in zebrafish
Source: eLife. 2021 Dec 7;10:e70550. doi: 10.7554/eLife.70550 (PMC8651297; doi:10.7554/eLife.70550)
Supplement: Figure 3—figure supplement 2—source data 1. [file elife-70550-fig3-figsupp2-data1.xlsx]

## Sheet: Fig.3-figure supplement 2B
Number of TUNEL+ cells per retinal section
	STD MO							Bonferroni's multiple comparisons test	Mean Diff.	95.00% CI of diff.	Below threshold?	Summary	Adjusted P Value
24h	1.67	2	2.33	3.67	1.67	2.67
36h	2	4.33	1.33	1.67	3	0.67		STD MO vs p53 MO
48h	0	1.33	1	0.67	0	0		24h	1.113	0.006120 to 2.221	Yes	*	0.0484
								36h	1.388	0.2811 to 2.496	Yes	*	0.0102
	p53 MO							48h	-0.1117	-1.219 to 0.9955	No	ns	>0.9999
24h	1.67	0.33	2	1.33	1.67	0.33
36h	0.67	0.33	1.33	0.67	0.67	1
48h	0.33	1	1	0.67	0.67	0
