# Supplementary material for: Mechanisms underlying microglial colonization of developing neural retina in zebrafish
Source: eLife. 2021 Dec 7;10:e70550. doi: 10.7554/eLife.70550 (PMC8651297; doi:10.7554/eLife.70550)
Supplement: Figure 3—figure supplement 3—source data 1. [file elife-70550-fig3-figsupp3-data1.xlsx]

## Sheet: Fig.3-figure supplement 3B
mfap4 + cells in retina
STD MO	p53 MO
21	1			Unpaired t test with Welch's correction
24	21			P value	0.268
16	15			P value summary	ns
19	14			Significantly different (P < 0.05)?	No
17	21			One- or two-tailed P value?	Two-tailed
20	17			Welch-corrected t, df	t=1.150, df=15.15
14	15
14	15
17	11
12	19

## Sheet: Fig.3-figure supplement 3D
mfap4+ cells in optic tectum
STD MO	p53 MO			Unpaired t test with Welch's correction
48	22			P value	0.0139
39	25			P value summary	*
43	28			Significantly different (P < 0.05)?	Yes
35	18			One- or two-tailed P value?	Two-tailed
27	24			Welch-corrected t, df	t=3.412, df=6.096
	31
