# Supplementary material for: Mechanisms underlying microglial colonization of developing neural retina in zebrafish
Source: eLife. 2021 Dec 7;10:e70550. doi: 10.7554/eLife.70550 (PMC8651297; doi:10.7554/eLife.70550)
Supplement: Figure 3—source data 1. [file elife-70550-fig3-data1.xlsx]

## Sheet: Fig. 3C (42 hpf)
42hpf	mCherry-zGem-positive area size in each retinal section	Number of microglia in mCherry-zGem-positive area	mCherry-zGem-negative area size in each retinal section	Number of microglia in mCherry-zGem-negative area	Normalized fraction of microglia in mCherry-zGem-positive area per section	Normalized fraction of microglia in mCherry-zGem-positive area per each individual		Averaged fraction of microglia in mCherry-zGem-positive area
sample 16	19766	0	7580	3	0	0.224724		0.0737853
	14370	1	10751	3	0.199606
	10612	0	21097	6	0
	3025	1	28138	4	0.699289
sample18	25372	0	0	0		0.080152
	22383	1	7086	1	0.240456
	15296	0	13781	4	0
	4024	0	24628	7	0
sample19	16578	0	7166	1	0	0
	9737	0	16597	2	0
	0	0	26650	7
sample20	21136	0	4826	1	0	0.0602515
	13690	1	12082	4	0.180755
	9169	0	16854	8	0
sample14	22260	0	6072	1	0	0
	8472	0	20839	5	0
	6597	0	27164	6	0
sample15	24044	0	6005	1	0	0.0775843
	16026	1	14585	3	0.232753
	10088	0	19078	6	0

## Sheet: Fig. 3C (48 hpf)
48hpf	mCherry-zGem-positive area size in each retional section	Number of microglia in mCherry-zGem-positive area	mCherry-zGem-negative area size in each retinal section	Number of microglia in mCherry-zGem-negative area	Normalized fraction of microglia in mCherry-zGem-positive area per section	Normalized fraction of microglia in mCherry-zGem-positive area per each individual		Averaged fraction of microglia in mCherry-zGem-positive area
sample1b	5975	0	26641	9	0	0		0.0613517
	1615	0	32240	13	0
sample5	9037	0	17084	4	0	0.184055
	0	0	33387	11
	4173	1	29172	12	0.36811
sample 6	9926	0	15993	4	0	0
	4994	0	30001	12	0

## Sheet: Sheet1
M-index	0.224724	0.080152	0	0.0602515	0	0.0775843	0	0.184055	0
	0.775276	0.919848	1	0.939748	1	0.922416	1	0.815945	1	1	1	1
