# Supplementary material for: Mechanisms underlying microglial colonization of developing neural retina in zebrafish
Source: eLife. 2021 Dec 7;10:e70550. doi: 10.7554/eLife.70550 (PMC8651297; doi:10.7554/eLife.70550)
Supplement: Figure 4—figure supplement 4—source data 1. [file elife-70550-fig4-figsupp4-data1.xlsx]

## Sheet: Fig.4-figure supplement 4B
TUNEL+ cells in retina
wt sibling	slbp1 mutant			Unpaired t test
0.33	6			P value	0.0479
2.66	20.6			P value summary	*
2.5	15.76			Significantly different (P < 0.05)?	Yes
				One- or two-tailed P value?	Two-tailed
				t, df	t=2.819, df=4
