# Supplementary material for: Mechanisms underlying microglial colonization of developing neural retina in zebrafish
Source: eLife. 2021 Dec 7;10:e70550. doi: 10.7554/eLife.70550 (PMC8651297; doi:10.7554/eLife.70550)
Supplement: Figure 4—figure supplement 5—source data 1. [file elife-70550-fig4-figsupp5-data1.xlsx]

## Sheet: Fig.4-figure supplement 5D
number of mpeg1.1:EGFP+ cells
STD MO	Cxcl12a		Unpaired t test
20	31		P value	0.7931
27	28		P value summary	ns
28	15		Significantly different (P < 0.05)?	No
23	28		One- or two-tailed P value?	Two-tailed
14	21		t, df	t=0.2673, df=14
16	22
20	18
16	8
