# Supplementary material for: Mechanisms underlying microglial colonization of developing neural retina in zebrafish
Source: eLife. 2021 Dec 7;10:e70550. doi: 10.7554/eLife.70550 (PMC8651297; doi:10.7554/eLife.70550)
Supplement: Figure 4—figure supplement 7—source data 1. [file elife-70550-fig4-figsupp7-data1.xlsx]

## Sheet: Sheet1
UAS:myc-NICD inj to hsp:gal4; ath5:EGFP embryos	ath5:EGFP-negative columns	ath5:EGFP-positive columns
embryo 1	5	0
embryo 2	28	1
embryo 3	15	0
embryo 4	19	0
embryo 5	16	1
total number	83	2
UAS:mCherry inj to hsp:gal4; ath5:EGFP embryos	ath5:EGFP-negative columns	ath5:EGFP-positive columns
embryo 1	28	30
embryo 2	41	24
embryo 3	23	32
embryo 4	3	3
embryo 5	24	16
total number	119	105
P value and statistical significance
Test	Chi-square
Chi-square, df	53.96, 1
z	7.345
P value	<0.0001
P value summary	****
One- or two-sided	Two-sided
Statistically significant (P < 0.05)?	Yes
Data analyzed	UAS-mycNICD expressing retinal columns	UAS-mCherry expressing retinal columns	Total
ath5:EGFP negative	83	119	202
ath5:EGFP positive	2	105	107
Total	85	224	309
Percentage of row total	UAS-mycNICD expressing retinal columns	UAS-mCherry expressing retinal columns
ath5:EGFP negative	41.09%	58.91%
ath5:EGFP positive	1.87%	98.13%
Percentage of column total	UAS-mycNICD expressing retinal columns	UAS-mCherry expressing retinal columns
ath5:EGFP negative	97.65%	53.13%
ath5:EGFP positive	2.35%	46.88%
Percentage of grand total	UAS-mycNICD expressing retinal columns	UAS-mCherry expressing retinal columns
ath5:EGFP negative	26.86%	38.51%
ath5:EGFP positive	0.65%	33.98%
