# Supplementary material for: Mechanisms underlying microglial colonization of developing neural retina in zebrafish
Source: eLife. 2021 Dec 7;10:e70550. doi: 10.7554/eLife.70550 (PMC8651297; doi:10.7554/eLife.70550)
Supplement: Figure 4—source data 1. [file elife-70550-fig4-data1.xlsx]

## Sheet: Fig4B
Number of ocular map4+ cells
WT sibling	slbp1 mutant				Unpaired t test
23	5				P value	0.0004
18	8				P value summary	***
22	6				Significantly different (P < 0.05)?	Yes
11	5				One- or two-tailed P value?	Two-tailed
14	1				t, df	t=5.524, df=9
	3
