# Supplementary material for: Mechanisms underlying microglial colonization of developing neural retina in zebrafish
Source: eLife. 2021 Dec 7;10:e70550. doi: 10.7554/eLife.70550 (PMC8651297; doi:10.7554/eLife.70550)
Supplement: Figure 4—source data 2. [file elife-70550-fig4-data2.xlsx]

## Sheet: Fig4D
Number of tail map4+ cells
WT sibling	slbp1 mutant			Unpaired t test
57	53			P value	0.836
49	45			P value summary	ns
59	63			Significantly different (P < 0.05)?	No
				One- or two-tailed P value?	Two-tailed
				t, df	t=0.2209, df=4
