# Supplementary material for: Mechanisms underlying microglial colonization of developing neural retina in zebrafish
Source: eLife. 2021 Dec 7;10:e70550. doi: 10.7554/eLife.70550 (PMC8651297; doi:10.7554/eLife.70550)
Supplement: Figure 4—source data 3. [file elife-70550-fig4-data3.xlsx]

## Sheet: Fig4F
Number of ocular map4+ cells
non inj	UAS:EGFP	UAS:EGFP+UAS:myc-NICD
24	21	10			Tukey's multiple comparisons test	Summary	Adjusted P Value
15	8	2			no inj vs. UAS:EGFP	ns	0.2381
12	12	4			no inj vs. UAS:EGFP+UAS:mycNICD	***	0.0006
28	15	15			UAS:EGFP vs. UAS:EGFP+UAS:mycNICD	*	0.0217
21	14	0
24	19	8
17	19	11
