# Supplementary material for: Mechanisms underlying microglial colonization of developing neural retina in zebrafish
Source: eLife. 2021 Dec 7;10:e70550. doi: 10.7554/eLife.70550 (PMC8651297; doi:10.7554/eLife.70550)
Supplement: Figure 4—source data 4. [file elife-70550-fig4-data4.xlsx]

## Sheet: Fig4H
Number of ocular map4+ cells
STD MO	ath5 MO			Unpaired t test with Welch's correction
21	6			P value	0.0276
10	4			P value summary	*
8	4			Significantly different (P < 0.05)?	Yes
15	12			One- or two-tailed P value?	Two-tailed
20	3			Welch-corrected t, df	t=2.650, df=8.555
3	5
16	8
