# Supplementary material for: Mechanisms underlying microglial colonization of developing neural retina in zebrafish
Source: eLife. 2021 Dec 7;10:e70550. doi: 10.7554/eLife.70550 (PMC8651297; doi:10.7554/eLife.70550)
Supplement: Figure 5—source data 1. [file elife-70550-fig5-data1.xlsx]

## Sheet: Figure 5C
Fraction of mfap4+ cells associated with donor columns
wt -> wt	wt -> mut			Unpaired t test
8.33	26.67			P value	0.0219
9.091	90.91			P value summary	*
15	100			Significantly different (P < 0.05)?	Yes
26.67				One- or two-tailed P value?	Two-tailed
29.41				t, df	t=3.072, df=6

## Sheet: Figure 5D
Trapping efficieney of microglia per donor column
wt -> wt	wt -> mut			Unpaired t test
2.0825	8.89			P value	0.0081
4.5455	22.73			P value summary	**
5	14.29			Significantly different (P < 0.05)?	Yes
3.325				One- or two-tailed P value?	Two-tailed
2.674				t, df	t=3.885, df=6

## Sheet: Figure 5G
Fraction of mfap4+ cells associated with EGFP+ columns
UAS:EGFP	UAS:EGFP + UAS:myc-NICD			Unpaired t test with Welch's correction
39	21.4			P value	0.0006
48	33.3			P value summary	***
51	25			Significantly different (P < 0.05)?	Yes
50	18.1			One- or two-tailed P value?	Two-tailed
62.5	16.6			Welch-corrected t, df	t=5.677, df=7.606

## Sheet: Figure 5H
Trapping efficiency of mfap4+ cells per EGFP+ column
UAS:EGFP	UAS:EGFP + UAS:myc-NICD			Unpaired t test with Welch's correction
3	3.06			P value	0.0129
5.3	1.9			P value summary	*
3.2	1.08			Significantly different (P < 0.05)?	Yes
3.8	1.8			One- or two-tailed P value?	Two-tailed
6.25	1.29			Welch-corrected t, df	t=3.457, df=6.192
