# Supplementary material for: Mechanisms underlying microglial colonization of developing neural retina in zebrafish
Source: eLife. 2021 Dec 7;10:e70550. doi: 10.7554/eLife.70550 (PMC8651297; doi:10.7554/eLife.70550)
Supplement: Figure 6—figure supplement 2—source data 1. [file elife-70550-fig6-figsupp2-data1.xlsx]

## Sheet: Fig6-figure supplement 2B
Number of ocular mfap4+ cells
il34 +/+	il34 +/–	il34–/–
6	3	0			Tukey's multiple comparisons test	Mean Diff.	95.00% CI of diff.	Below threshold?	Summary	Adjusted P Value
3	3	0			il34 +/+ vs. il34 +/–	0.7143	-1.944 to 3.372	No	ns	0.7707
8	2	0			il34 +/+ vs. il34–/–	5	2.088 to 7.912	Yes	**	0.0012
5	5	0			il34 +/– vs. il34–/–	4.286	1.374 to 7.198	Yes	**	0.0043
5	7	0
1	3
7	7
