# Supplementary material for: Mechanisms underlying microglial colonization of developing neural retina in zebrafish
Source: eLife. 2021 Dec 7;10:e70550. doi: 10.7554/eLife.70550 (PMC8651297; doi:10.7554/eLife.70550)
Supplement: Figure 6—figure supplement 3—source data 1. [file elife-70550-fig6-figsupp3-data1.xlsx]

## Sheet: Fig6-figure supplement 3
il34 mRNA/actb2 mRNA
sibling	slbp1 mutant		Unpaired t test
1.09873	1.11427		P value	0.7239
1.06971	1.0079		P value summary	ns
0.920284	0.862425		Significantly different (P < 0.05)?	No
			One- or two-tailed P value?	Two-tailed
			t, df	t=0.3791, df=4
