# Supplementary material for: Mechanisms underlying microglial colonization of developing neural retina in zebrafish
Source: eLife. 2021 Dec 7;10:e70550. doi: 10.7554/eLife.70550 (PMC8651297; doi:10.7554/eLife.70550)
Supplement: Figure 6—source data 1. [file elife-70550-fig6-data1.xlsx]

## Sheet: Fig6B
Number of ocular mfap4+ cells
il34 +/+	il34 +/–	il34–/–
15	12	0			Tukey's multiple comparisons test	Mean Diff.	95.00% CI of diff.	Below threshold?	Summary	Adjusted P Value
8	13	1			il34 +/+ vs. il34 +/–	3.846	-0.6194 to 8.312	No	ns	0.1012
11	12	2			il34 +/+ vs. il34–/–	12.86	7.667 to 18.05	Yes	****	<0.0001
7	6	2			il34 +/– vs. il34–/–	9.011	4.183 to 13.84	Yes	***	0.0003
8	5	1
16	6	2
22	8	0
24	14
15	7
	15
	9
	13
	12
